# Supplementary material
Source: PubMed Central journal article supplement (PMC4486520)
Supplement: NIHMS676811-supplement-supp_hi_res.pdf [file NIHMS676811-supplement-supp_hi_res.pdf]

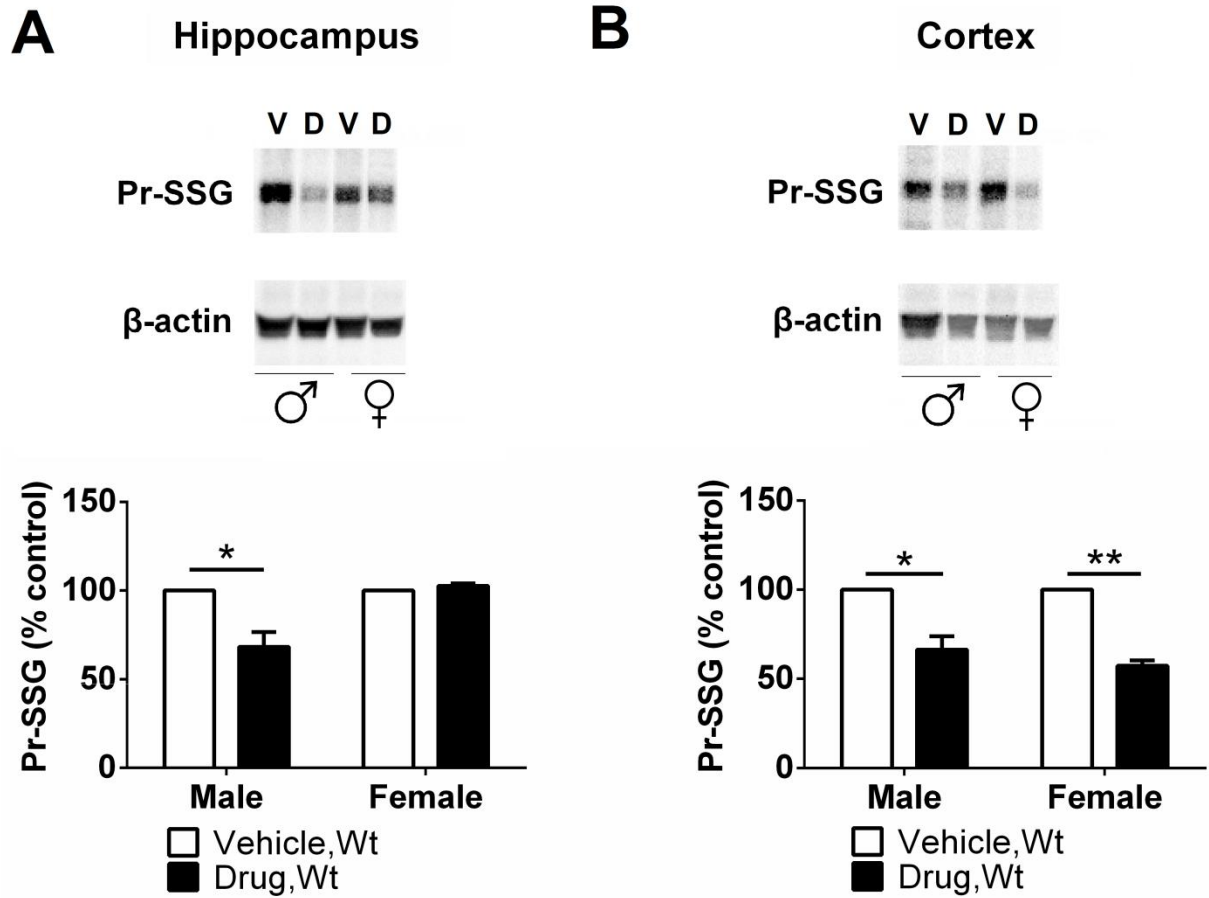

**Supplementary Figure 1.** The quantification of tissue Pr-SSG levels in male and female Wt mice. The representative immunoblots showing reduced Pr-SSG levels in hippocampi (A) and cortices (B) of both male and female mice treated with drug. All data are expressed as Mean  $\pm$  SEM, n=3 mice/group. Statistical analyses were conducted via 2-way ANOVA with Tukey's Multiple Comparison post-hoc test. V, vehicle; D, drug. The treatment effect: vehicle versus drug. \*p<0.05, \*\*p<0.01.
